# Supplementary material for: Direct repression of MYB by ZEB1 suppresses proliferation and epithelial gene expression during epithelial-to-mesenchymal transition of breast cancer cells
Source: PubMed Central journal article supplement (PMC3979034; doi:10.1186/bcr3580), 2013-11-27

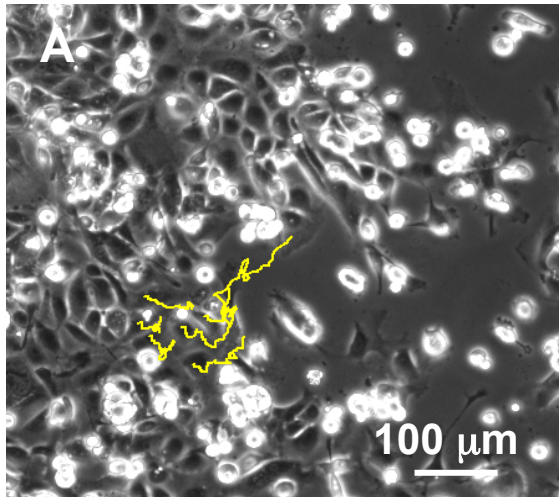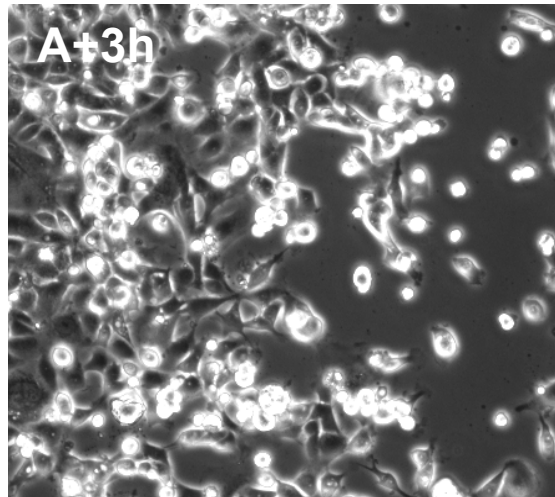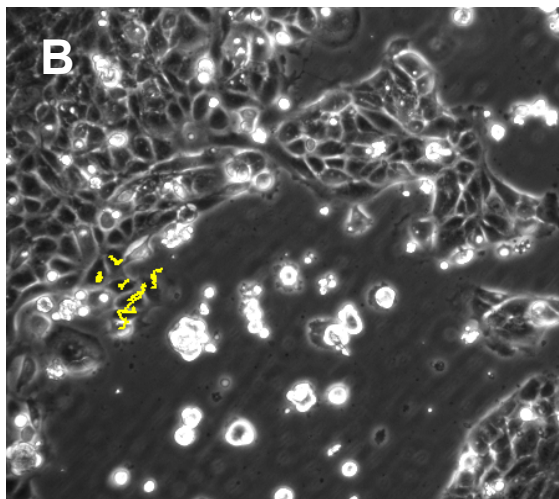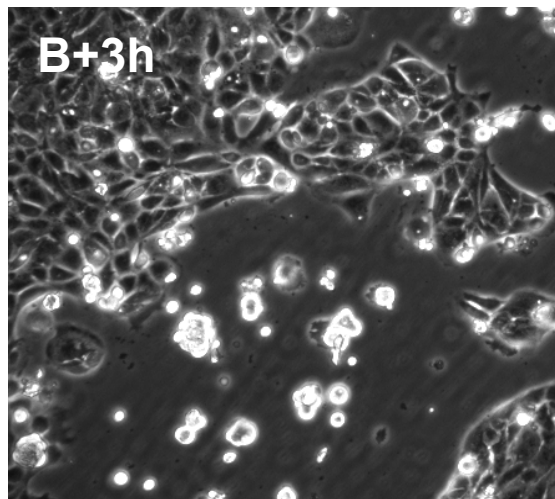

Supplement: bcr3580-S4.pdf [file bcr3580-S4.pdf]
